1 **PRG2 and AQPEP are misexpressed in fetal membranes in placenta previa and percreta**

2

3 Elisa T. Zhang<sup>1</sup>, Roberta L. Hannibal<sup>1,6</sup>, Keyla M. Badillo Rivera<sup>1,7</sup>, Janet H.T. Song<sup>1,8</sup>, Kelly

4 McGowan<sup>1</sup>, Xiaowei Zhu<sup>1,2</sup>, Gudrun Meinhardt<sup>3</sup>, Martin Knöfler<sup>3</sup>, Jürgen Pollheimer<sup>3</sup>, Alexander

5 E. Urban<sup>1,2</sup>, Ann K. Folkins<sup>4</sup>, Deirdre J. Lyell<sup>5</sup>, Julie C. Baker<sup>1,5\*</sup>

6

7 <sup>1</sup>Department of Genetics, Stanford University School of Medicine, Stanford, California, United  
8 States of America.

9 <sup>2</sup>Department of Psychiatry and Behavioral Sciences, Stanford University School of  
10 Medicine, Stanford, California, United States of America.

11 <sup>3</sup>Department of Obstetrics and Gynaecology, Reproductive Biology Unit, Medical University of  
12 Vienna, Vienna, Austria.

13 <sup>4</sup>Department of Pathology, Stanford University School of Medicine, Stanford, California, United  
14 States of America.

15 <sup>5</sup>Department of Obstetrics and Gynecology, Stanford University School of Medicine, Stanford,  
16 California, United States of America.

17 <sup>6</sup>Present address: Second Genome, Inc., Brisbane, California, United States of America.

18 <sup>7</sup>Present address: Eversana Consulting, South San Francisco, California, United States of  
19 America.

20 <sup>8</sup>Present address: Division of Genetics and Genomics, Boston Children's Hospital, Harvard  
21 Medical School, Boston, Massachusetts, United States of America.

22

23 \*Correspondence: [jbaker@stanford.edu](mailto:jbaker@stanford.edu)

24 300 Pasteur Dr.

25 Alway M337

26 Palo Alto, CA 94305-5120

27

28 **Running title:** Molecular signatures of placenta previa and PAS

29 **Keywords:** Placenta, fetal membranes, placenta accreta spectrum, placenta previa, PRG2,

30 AQPEP

31 **Summary sentence:** 3SEQ and immunofluorescence reveal that extravillous trophoblast

32 factors, most notably PRG2 and AQPEP, define the diseases placenta previa and placenta

33 accreta spectrum (PAS) in both the chorioamniotic membranes and the placental disk.

34 **Grant support:** This work was funded by an NIH grant (NICHD R01 HD094513), a Stanford

35 Discovery and Innovation Foundation Grant, and a Stanford SPARK grant to J.C.B. E.T.Z was

36 supported by an A.P. Giannini Foundation postdoctoral fellowship, a Stanford Child Health

37 Research Institute postdoctoral award, and a Stanford Dean's Postdoctoral Fellowship. J.H.T.S.  
38 was supported by a National Science Foundation Graduate Research Fellowship and Stanford  
39 Graduate Fellowship. M.K. and J.P. are supported by grants from the Austrian Science Fund  
40 (P31470-B30 and P-33485-B30). D.J.L. was supported by The Arline and Pete Harman Faculty  
41 Scholar Fund from the Stanford Maternal Child Health Research Institute and the former  
42 Stanford Child Health Research Institute.

43

44

#### 45 **Abstract**

46 The obstetrical conditions placenta accreta spectrum (PAS) and placenta previa are a  
47 significant source of pregnancy-associated morbidity and mortality, yet the specific molecular  
48 and cellular underpinnings of these conditions are not known. In this study, we identified  
49 misregulated gene expression patterns in tissues from placenta previa and percreta (the most  
50 extreme form of PAS) compared with control cases. By comparing this gene set with existing  
51 placental single-cell and bulk RNA-Seq datasets, we show that the upregulated genes  
52 predominantly mark extravillous trophoblasts. We performed immunofluorescence on several  
53 candidate molecules and found that PRG2 and AQPEP protein levels are upregulated in both  
54 the fetal membranes and the placental disk in both conditions. While this increased AQPEP  
55 expression remains restricted to trophoblasts, PRG2 is mislocalized and is found throughout the  
56 fetal membranes. Using a larger patient cohort with a diverse set of gestationally aged-matched  
57 controls, we validated PRG2 as a marker for both previa and PAS and AQPEP as a marker for  
58 only previa in the fetal membranes membranes. Our findings suggest that the extraembryonic  
59 tissues surrounding the conceptus, including both the fetal membranes membranes and the  
60 placental disk, harbor a signature of previa and PAS that reflects increased trophoblast  
61 invasiveness.

62

## 63 Introduction

64 Placenta accreta spectrum (PAS) is a condition that is increasing at an alarming rate<sup>1</sup>,  
65 yet despite its significant harm to mothers and infants, the molecular and cellular origins are not  
66 well-understood. PAS is characterized by excessive invasion of the placental cells into the  
67 myometrium or muscle wall of the uterus. Deliveries associated with PAS are extremely  
68 challenging because the placenta becomes pathologically attached to the uterus, leading to  
69 hemorrhage and high rates of maternal and neonatal morbidity and mortality<sup>1,2</sup>. PAS is  
70 characterized by the subtypes accreta, increta, and and percreta delineating the extent of this  
71 invasion<sup>1</sup>. Percreta is the most extreme case, in which invasion extends through the uterine wall  
72 and sometimes into neighboring organs such as the bladder<sup>1,3</sup>. Nearly all accreta patients are  
73 also afflicted with previa, a condition in which the placenta is located in the lower segment of the  
74 uterus, directly covering the cervix<sup>4,5</sup>. This placement thus precludes vaginal delivery and puts  
75 the mother at risk of intra- and post-partum hemorrhage<sup>6-9</sup>. Both PAS and previa are associated  
76 with uterine damage or dysfunction as a result of previous cesarean deliveries, endometrial  
77 ablation, in vitro fertilization (IVF), or advanced maternal age<sup>1,10-13</sup>. A combination of multiple  
78 previous cesarean deliveries and previa elevates the risk of accreta to 67%, strongly supporting  
79 the correlation between uterine damage, previa, and PAS<sup>5</sup>.

80

81 While placental trophoblast cells appear to be at the heart of PAS, the role they play is  
82 unknown. The prevailing model is that uterine scar tissue, combined with placental placement in  
83 the lower uterus (previa), leads to deficient decidualization and the absence of appropriate  
84 regulatory signals to the trophoblasts, resulting in abnormal and aggressive placental invasion.  
85 Consistent with this model, PAS is characterized by expanded numbers of invasive extravillous  
86 trophoblasts (EVT)s<sup>14-16</sup>. EVT's are also expanded in previa, even though placental overinvasion  
87 is not characteristic of this disease<sup>17</sup>. The misexpression of several molecules within  
88 trophoblasts have been shown to correlate with disease, including lower levels of  $\beta$ -catenin in

89 previa and accreta<sup>18</sup>, higher levels of HMG1 and VEGF in previa<sup>19</sup>, higher levels of DOCK4 in  
90 accreta trophoblasts<sup>20</sup>, and absence of osteopontin staining in percreta<sup>21</sup>. An in-depth  
91 examination of the involvement of trophoblasts, even years after uterine damage, is thus  
92 intriguing and critical for understanding disease etiology.

93

94 Although the placental disk plays a vital role in many diseases of pregnancy, the fetal  
95 membranes have also been implicated in some conditions. These extraplacental membranes,  
96 which line the fluid-filled amniotic sac to protect the fetus, are susceptible to infection and/or  
97 rupture that can jeopardize fetal health and lead to preterm birth. While not previously thought to  
98 be affected in placental diseases like preeclampsia, the fetal membranes have been found to  
99 contain cellular and molecular pathologies<sup>22</sup>. For example, in severe preeclampsia, the  
100 trophoblast layer is expanded in thickness in the fetal membranes. This is further accompanied  
101 by misexpression of many oxidative stress and immune genes, including key pregnancy  
102 proteins such as PAPP, HTRA4, and CSH1<sup>22</sup>. In addition, recent studies report cases of  
103 physically adherent membranes during delivery, as well as the presence of myometrial  
104 myofibers attached to these membranes<sup>15,23</sup>. These cases are often associated with either  
105 concurrent, subsequent, or prior PAS, thus raising the idea of fetal membrane involvement in  
106 this disease<sup>24</sup>. Therefore, while trophoblast overinvasion and expansion of EVT's in PAS is seen  
107 primarily in the placental disk<sup>16</sup>, the membranes may also be compromised.

108

109 Here we examined the fetal membranes of PAS and previa compared to gestationally  
110 age-matched controls to identify molecules that could discriminate between these conditions.  
111 We found that 74 transcripts were significantly upregulated in cases of percreta and previa.  
112 These genes are highly enriched for extracellular molecules that are EVT-specific markers. We  
113 validated two of these molecules, Proteoglycan 2 (PRG2) and Aminopeptidase Q (AQPEP;  
114 otherwise known as Laeverin), using immunofluorescence in the membranes of PAS, previa,



115 and a diverse set of controls. We further demonstrate that PRG2 and AQPEP are  
116 misexpressed within the placental disc in PAS. Overall, there is an EVT molecular signature  
117 within previa and PAS membranes, revealing that extraembryonic tissues, including the fetal  
118 membranes, are affected in these diseases.

119

120

## 121 **Methods**

122

### 123 ***Patient samples***

124 All sample collection and clinical data abstraction was conducted in accordance with  
125 protocols approved by the Stanford Institutional Review Board (IRB #20237). Samples were  
126 processed and stored as formalin-fixed, paraffin embedded (FFPE) tissue blocks by the  
127 Stanford Pathology department. All samples included in this study and corresponding clinical  
128 data are listed in Supplemental Table S1. Two cohorts of patients were included in this study:  
129 the initial discovery cohort (cohort 1) of placenta previa, PAS, and spontaneous preterm birth  
130 (SPTB) control samples on which we performed 3SEQ and immunofluorescence (see below),  
131 and a validation cohort (cohort 2) composed of placenta previa, PAS, and gestationally age-  
132 matched controls (see below and see Results).

133

### 134 ***3SEQ and differential gene expression analysis in cohort 1 fetal membranes***

135 Tissue regions containing all layers of the fetal membranes (amnion, chorionic  
136 mesoderm, trophoblasts, and decidua) were cored from FFPE blocks. RNA was isolated from  
137 these cores using the RecoverAll Total Nucleic Acid Isolation Kit (Ambion, cat. no. 1975). 3SEQ  
138 libraries were prepared according to Beck et al. 2010<sup>25</sup>. Briefly, polyA selection was performed  
139 using the Dynabeads mRNA Purification Kit (Invitrogen), followed by cDNA synthesis using a  
140 P7-containing primer and Superscript III Reverse Transcriptase (Invitrogen) and A-tailing. After

141 purification using the MinElute Kit (Qiagen) and ligation of double-stranded P5 linker to cDNA,  
142 agarose gel fractionation and purification (MinElute Kit; Qiagen) was performed to isolate linker-  
143 ligated cDNA of fragment length 200-300 bp. Final libraries were generated by PCR  
144 amplification of the linker-ligated cDNA with Illumina-compatible primers and Phusion PCR  
145 Master Mix (New England Biolab) using a 15 cycle program (98°C for 30 sec; 15 cycles of 98°C  
146 for 10 sec, 65°C for 30 sec, 72°C for 30 sec; 72°C for 5 min). 3SEQ libraries were sequenced  
147 using an Illumina HiSeq 2500 to an average read depth of ~25 million reads per sample.  
148 Sequencing read statistics are provided in Supplemental Table S2. Single-end reads were  
149 mapped to the hg38 reference genome (Supplemental Table S2) using TopHat<sup>26</sup>. Adapters  
150 were removed using cutadapt<sup>27</sup>, and read quality control was performed using FastQC. Gene  
151 expression counts were obtained using UniPeak<sup>28</sup>. The sequencing reads identified a total of  
152 11,476 genes. Of these transcripts, we excluded 168 genes with fewer than an average of 10  
153 reads per sample across all samples. Of the remaining 11,308 transcripts, we excluded 329  
154 instances of ambiguous multi-gene mappings, leaving a total of 10,979 genes for subsequent  
155 analysis. Differential gene expression was analyzed using DESeq<sup>29</sup>. GO term analysis was  
156 performed using geneontology.org with Fisher's exact test and Bonferonni correction. 3SEQ  
157 data from this study is available via the NCBI dbGaP under accession no. phs002075.v1.p1.  
158 Genes differentially-expressed between SPTB and both previa and PAS were compared against  
159 genes differentially-expressed between MACS-isolated HLA-G<sup>+</sup> extravillous trophoblasts (EVTs)  
160 and EGFR<sup>+</sup> villous cytotrophoblasts (VCTBs) from first trimester placentas from 10-12 weeks of  
161 gestation, as described in detail in Vondra et al. 2019<sup>30</sup>. RNA-seq data from Vondra et al. 2019  
162 was obtained from GEO Series accession number GSE126530.

163

#### 164 ***Histology and Immunofluorescence on cohorts 1 and 2***

165 10% formalin-fixed, paraffin-embedded samples of fetal membranes and placental disks  
166 from cases and controls of cohorts 1 and 2 from the Stanford Pathology archive were cut into 5

167  $\mu$ m-thick sections. Sections were stained with hematoxylin and eosin (H&E) by deparaffinization  
168 with xylenes, rehydration in a graded series of ethanol in distilled water, staining with Harris  
169 hematoxylin (Sigma-Aldrich cat. no. SLBV6928), dehydration in a graded series of ethanol to  
170 70%, staining with alcoholic eosin Y (Sigma-Aldrich cat no. SLBW3770), followed by further  
171 dehydration and subsequent mounting in Permount (Fisher Scientific cat no. SF15-100). H&E  
172 staining was performed to identify regions with similar cell type compositions (amnion, chorionic  
173 mesoderm, trophoblasts, and decidua), which were then cored and subsequently subjected to  
174 either 3SEQ (see above) or re-embedding in paraffin for immunofluorescence.

175 Immunofluorescence was performed on cut sections after antigen retrieval in 0.01 M sodium  
176 citrate buffer, pH 6 in a pressure cooker. Sections were then blocked with blocking reagent (5%  
177 goat serum, 1% BSA, and 0.1% Triton-X 100 in PBS) and stained overnight at 4° C with  
178 antibodies against PRG2 (1:1000 dilution, rabbit; Sigma-Aldrich cat. no. HPA038515), HLA-G  
179 (1:10,000 dilution, mouse; Santa Cruz cat. no. sc-21799), or AQPEP (1:1000 for single-marker  
180 staining, 1:2000 for co-staining with anti-CK7; rabbit, Abcam cat. no. ab185345).

181 Immunofluorescence experiments were performed semi-quantitatively by titrating the primary  
182 antibody concentration to a point at which the which the lowest levels of the protein remained  
183 detectable, thus ensuring that the dynamic range of tissue intensities was well-represented.

184 After successive washes in PBST (0.1% Tween-20 in phosphate-buffered saline), native  
185 peroxidase activity was quenched with 3% hydrogen peroxide in PBS for 30 minutes. Biotin-  
186 conjugated secondaries against the relevant species (1:5000 goat anti-rabbit; 1:1000 goat anti-  
187 mouse) were applied for 1 hr. at room temperature (Jackson Immunoresearch, cat. no. 111-065-  
188 144 and 111-065-166, respectively). All antibodies were diluted in blocking reagent. After  
189 successive washes to remove unbound secondary antibody, an ABC peroxidase staining kit  
190 (Thermo Scientific Pierce, cat. no. 32020) and tyramide signal amplification (TSA) kit were used  
191 to apply Cy3 fluorophore (Perkin Elmer cat. no. NEL744001KT) for single-marker staining.

192 Where indicated, double-marker staining was performed sequentially after staining with the  
193 marker of interest, followed by repeating all steps from antigen retrieval through TSA using an  
194 antibody against CK7 (1:200, mouse; Dako cat. no. MS-1352) and the FITC fluorophore (Perkin  
195 Elmer cat. no. NEL741001KT). Slides were mounted in ProLong Gold Antifade Mountant with  
196 DAPI (Life Technologies, P36931). Images were acquired on a Leica DMRXA2 inverted  
197 fluorescence microscope and a Nikon Eclipse Ti inverted confocal microscope. For HLA-G, an  
198 additional 2 SPTB samples, as well as 1 increta sample that was not included in the original  
199 3SEQ, were included amongst cohort 1 immunofluorescence analyses.

200

### 201 ***Immunofluorescence image analysis***

202 Image intensity quantification and normalization were performed using ImageJ<sup>32</sup>. For  
203 discovery cohort samples (Fig. 2), tissue regions were selected by performing Otsu thresholding  
204 in ImageJ on the DAPI channel, from which a mask was created to quantify mean fluorescence  
205 intensity of this entire masked tissue region in the marker (PRG2, AQPEP, or HLA-G) channel.  
206 For the decidua basalis samples (Fig. 3), additional analyses were performed using Otsu  
207 thresholding on the channel of the marker to identify regions with marker staining, from which a  
208 mask was created to quantify mean fluorescence signal intensity specifically from regions  
209 positive for marker staining. For cohort 2 samples (Fig. 4), regions of interest (ROIs) containing  
210 CK7+ trophoblasts were selected manually, and total fluorescence intensity for PRG2, AQPEP,  
211 or HLA-G was calculated for each trophoblast-containing ROI. HLA-G<sup>+</sup> / CK7<sup>+</sup> cell counting data  
212 were obtained using custom MATLAB scripts.

213

214 Since protein marker levels in each patient sample was measured using multiple  
215 images, linear mixed-effects regression analysis was performed in R to assess statistical  
216 significance of fluorescence intensity differences between patient groups, with the disease state  
217 as the fixed effect and the patient donor as the random effect. Specifically, we used ANOVA to

218 test the model of fixed effects (disease) and random effects (patient) fluorescence ~ disease +  
219 (1|patient) against the null model fluorescence ~ (1|patient).

220

221 Linear mixed-effects regression analysis was performed in R to assess the correlation between  
222 mRNA transcript levels as measured by 3SEQ and marker protein levels as determined by  
223 immunofluorescence. We used ANOVA to test the model fluorescence ~ transcript\_level +  
224 (1|patient) against the null model fluorescence ~ (1|patient).

225

226

## 227 **Results**

228

### 229 ***Molecular differences in fetal membranes between previa, percreta, and spontaneous*** 230 ***preterm birth.***

231 To identify molecular signatures of previa and percreta in the fetal membranes, we  
232 performed 3SEQ on biobanked paraffin tissue blocks from previa (2), percreta (2) and SPTB (9)  
233 samples at 28-32 weeks of gestation (see Methods)<sup>25</sup>. We first used histopathology to identify  
234 tissue regions that contained similar cellular compositions and tissue architecture (amnion,  
235 chorionic mesoderm, trophoblasts, and decidua; see Fig. 1A for schematic). We then cored  
236 these regions from these tissue blocks for RNA extraction and sequencing. Principal component  
237 analysis (PCA) using data for all 13 samples show that these samples do not cluster by disease  
238 state (Fig. 1B), suggesting that these conditions are not globally distinct from one another. To  
239 identify individual genes that distinguish previa and percreta from SPTB, we performed  
240 differential gene expression analysis, which revealed 77 misexpressed genes, with 74  
241 upregulated in previa and percreta relative to SPTB and 3 downregulated in previa and percreta  
242 (Fig. 1C). Overall, while the fetal membranes are not globally different between these

243 conditions, there are select genes that distinguish previa and percreta from SPTB, suggesting  
244 that these might be informative biomarkers.

245

246 ***Genes misexpressed in previa and percreta are cell surface molecules expressed by***  
247 ***extravillous trophoblast factors.***

248 To examine whether the 74 upregulated genes can provide insight into the biology of  
249 these diseases, we performed GO analysis (Fig. 1D). Despite the low number of genes in this  
250 dataset, we found significant enrichment for extracellular, cell surface proteins and embryonic  
251 growth factors. Of the 71 upregulated genes that had GO annotations, 55% (39/71) are  
252 extracellular. These extracellular annotations include the terms extracellular region (34/71;  
253  $p=.00066$ ), plasma membrane (14/71;  $p=.0047$ ), and growth factor binding (8/71;  $p=0.00011$ ).  
254 Molecules represented include the HLA class I histocompatibility antigen, alpha chain G (HLA-  
255 G), proteoglycan 2 (PRG2), lysophosphatidic acid receptor 2 (LPAR2), ephrin-B1 (EFNB1),  
256 allograft inflammatory factor 1-like protein (AIF1L), fibroblast growth factor receptor 1 (FGFR1),  
257 the VEGF receptor FLT1, IL-2 receptor beta (IL2RB), and the leukemia inhibitory factor receptor  
258 (LIFR). Therefore, we show that genes aberrantly upregulated in previa and percreta relative to  
259 SPTB are predominantly extracellular proteins, some of which are involved in growth factor  
260 signaling.

261

262 To determine which placental cell types are involved in previa and PAS, we compared  
263 the 74 upregulated genes to markers of specific cells found in the placenta. We first used a  
264 recent single-cell study that identified 194 genes that could discriminate between different  
265 placental cell types, including EVT, syncytiotrophoblasts, decidual cells, endothelial cells, and  
266 immune cells<sup>33</sup>. When we compared the 74 upregulated genes to the 194 specific cell-type  
267 markers, we identified 9 genes that are present in both studies. Of these 9 genes, 8 (88.9%) are  
268 specific to EVTs (Supplemental Table S3). Since only 11.9% (23 out of 194) of the cell type

269 markers overall are specific for EVT<sub>s</sub>, this comparison demonstrates that genes upregulated in  
270 previa and percreta are highly enriched (~89%) for EVT-specific markers (test of two  
271 proportions, p-value =  $6.4 \times 10^{-9}$ ).

272

273 To further support that the upregulated signature represents EVT<sub>s</sub>, we examined an  
274 RNA-seq<sup>30</sup> and a microarray dataset<sup>34</sup>, both of which identified transcripts specific to EVT<sub>s</sub>  
275 relative to their progenitor cells, the villous cytotrophoblasts (VCT<sub>s</sub>). We first overlapped the 74  
276 genes upregulated in previa and percreta with both datasets. We found 42 and 21 of the 74  
277 genes in the RNA-seq and microarray datasets, respectively. Comparison with EVT- and VCT-  
278 specific genes from the RNA-seq experiment showed that 95.2% (40/42) were enriched in EVT<sub>s</sub>  
279 while only 4.8% (2/42) were enriched in VCT<sub>s</sub> (40/42 EVT genes vs. 1159 EVT genes / 1990  
280 total EVT-VCT genes, test of two proportions p =  $3.1 \times 10^{-6}$ ; Fig. 1E, Supplemental Table  
281 S3). Comparison with EVT- and VCT-specific transcripts from the microarray experiment  
282 showed that 95.2% (20/21) were upregulated in EVT<sub>s</sub> versus only 4.8% (1/74) upregulated in  
283 VCT<sub>s</sub> (20/21 EVT genes vs. 428 EVT genes / 885 total genes, test of two proportions p =  $5.7 \times$   
284  $10^{-5}$ ; Supplemental Table S3). In aggregate across all 3 datasets, including single-cell RNA-seq,  
285 RNA-seq, and microarray, 91.8% of the overlapping transcripts (45/49) are EVT-enriched  
286 whereas only 8.2% (4/49) are enriched in non-EVT<sub>s</sub> (Supplemental Table S3). Overall, the  
287 genes in the fetal membranes that distinguish previa and percreta from SPTB have a strong  
288 EVT transcriptional signature.

289

### 290 ***PRG2 and AQPEP are more abundant in previa and percreta compared to SPTB***

291 We next examined the protein expression levels and localization of several of the  
292 upregulated genes in histological sections of fetal membranes from the previa, percreta, and  
293 SPTB patient samples profiled above. We performed immunofluorescence using antibodies  
294 against AQPEP (aminopeptidase Q or Laeverin), PRG2 (proteoglycan 2), and HLA-G (human

295 leukocyte antigen G). In order to examine changes in protein levels as quantitatively as  
296 possible, we used the minimum antibody concentration at which the lowest levels of protein was  
297 just barely detected, thus ensuring that the highest levels of each protein did not exceed  
298 saturation and remained in linear range (see Methods). Consistent with the 3SEQ data, we  
299 observed an increase in staining of these antibodies in previa and percreta samples compared  
300 to SPTB (Fig. 2A). We found that whereas PRG2 is localized to both the trophoblasts and the  
301 chorionic mesoderm in SPTB, it is widely expressed throughout the membranes in all layers  
302 except the amnion in previa and percreta (Fig. 2A, top panel). In contrast, AQPEP and HLA-G  
303 are localized specifically to EVT<sub>s</sub> in all samples - SPTB, previa, and percreta. However, the  
304 intensity of staining within the EVT<sub>s</sub> is increased in the previa and percreta samples (Fig. 2A,  
305 middle and bottom panels).

306

307         To quantify differences in AQPEP, PRG2 and HLA-G protein levels between previa,  
308 percreta, and SPTB, we measured mean fluorescence intensities of 3-9 tissue regions imaged  
309 from each of 6-9 patients and performed linear mixed-effects regression. We found that PRG2  
310 and AQPEP are overexpressed in both previa and percreta compared to SPTB ( $p = 0.0051$  and  
311  $p = 0.0012$ , respectively; Fig. 2B). In addition, AQPEP expression is higher in previa than  
312 percreta ( $p = 0.027$ ), and HLA-G expression is higher in previa compared to SPTB ( $p = 0.023$ )  
313 but does not reach statistical significance when compared to PAS ( $p = 0.059$ ) (Fig. 2B). Co-  
314 staining with anti-HLA-G and with anti-cytokeratin-7 (CK7) to mark all trophoblasts  
315 (Supplemental Fig. S1A) revealed that fetal membrane samples from previa patients contained  
316 more HLA-G<sup>+</sup> trophoblasts compared to percreta, increta, or SPTB. This suggests that in these  
317 previa samples, the higher levels of HLA-G reflect an excess of trophoblasts (Supplemental Fig.  
318 S1B). Taken together, this cohort analysis suggests that PRG2 and AQPEP are elevated in both  
319 previa and percreta, with PRG2 also being mislocalized throughout the fetal membranes (Fig. 2,  
320 Table 1).



321           Next, we tested whether there was a direct correlation between RNA and protein levels  
322 for PRG2, AQPEP, and HLA-G. To this end, we plotted normalized read counts from the 3SEQ  
323 data against the average immunofluorescence staining intensity from the same patient and  
324 performed linear mixed-effects regression. The increases in protein and mRNA levels for PRG2  
325 and AQPEP were strongly correlated, with an  $R^2$  value of 0.73 (p-value = 0.031) for PRG2 and  
326  $R^2 = 0.79$  (p-value = 0.019) for AQPEP (Fig. 2C). HLA-G protein and mRNA levels were  
327 moderately correlated, though this did not reach statistical significance ( $R^2 = 0.45$ , p-value =  
328 0.069; Fig. 2C). Prior reports in the literature find that cellular concentrations of many proteins  
329 correlate only moderately with transcript levels<sup>35,36</sup>, with one review citing  $R^2$  values around  
330 0.4<sup>37</sup>. Therefore, the strong correlations between the protein and RNA levels of these three  
331 genes support the idea that the remaining misregulated genes are also likely misregulated as  
332 proteins within the fetal membranes.

333

### 334 ***PRG2 and AQPEP are more abundant in the placental disk in previa and PAS***

335           We next asked whether the misregulation of PRG2, AQPEP, and HLA-G in the fetal  
336 membranes is also observed in the placental disk. To this end, we performed  
337 immunohistochemistry on the placental disk from the same pregnancies transcriptionally profiled  
338 by 3SEQ (Fig. 3). In all comparisons, AQPEP is significantly more abundant in previa and  
339 percreta than in SPTB, consistent with what was described for the fetal membranes (Fig. 3A,B).  
340 Protein levels for HLA-G were elevated in previa vs. SPTB, matching the trend observed in the  
341 fetal membranes, though without passing a significance threshold (p=0.059; Fig. 3B). In contrast  
342 to AQPEP and HLA-G, which display the same overall trends between the placental disk and  
343 the membranes, PRG2 protein levels can discriminate between SPTB and percreta, but not  
344 between SPTB and previa (Fig. 3A,B). PRG2 levels are also higher in percreta than in previa,  
345 though without statistical significance (p=0.079). We thus find that many of the molecular  
346 changes in the fetal membranes between disease states are also present in the placental disk.

347

348 ***Second patient cohort supports findings for PRG2 and AQPEP***

349 To determine whether PRG2, AQPEP, and HLAG could be used more broadly to  
350 discriminate disease states, we performed immunofluorescence on a second, larger cohort of  
351 patient samples. This validation cohort (cohort 2) was composed of 5 gestationally age-matched  
352 control samples (31-37 wk), 6 previa samples (29-38 wk), and 16 PAS samples (4 accretas, 31-  
353 35 wk; 2 incretas, 31-36 wk; and 10 percretas, 28-37 wk). Importantly, the controls were from a  
354 variety of conditions that were not SPTB: cervical cancer requiring a C-section hysterectomy  
355 (n=2, 34 wk), term pregnancy with chorioamnionitis (n=1, 37 wk), and twin pregnancies in which  
356 one twin was affected with increta (n=1, 31 wk) or accreta (n=1, 32 wk; Fig. 4, Supplemental  
357 Fig. S2, Supplemental Table S1). In this larger cohort, we performed immunofluorescence by  
358 costaining with anti-CK7 to mark all trophoblasts and either anti-PRG2, anti-AQPEP, or anti-  
359 HLA-G (Supplemental Fig. S2). We then quantified the intensity of each marker in regions  
360 containing CK7<sup>+</sup> trophoblasts as described in the Methods. In concordance with the results from  
361 the initial discovery cohort (Fig. 2A,B), protein levels of PRG2 are significantly higher in previa  
362 and PAS in all of the following comparisons: both previa and PAS compared to controls (p-value  
363 = 0.023), previa compared to controls (p=0.0099), and PAS compared to controls (p=0.038)  
364 (Fig. 4A). For AQPEP, we observe higher levels in previa relative to either controls (p = 0.050)  
365 or PAS (p = 0.0038), thus recapitulating the results of cohort 1 (Fig. 4B, Fig. 2A,B). However, in  
366 contrast to cohort 1, AQPEP levels in cohort 2 are not higher in PAS compared to controls.  
367 HLA-G did not recapitulate the higher levels or greater cell numbers in previa observed in cohort  
368 1 (Fig. 4C, Fig. 2A,B). Overall, this second cohort, using different controls, validate all of the  
369 initial findings for PRG2 as well as a key trend for AQPEP (Fig. 2, Fig. 4, Table 1).

370

371

372

## 373 Discussion

374 In this study, we identified several candidate molecules that are misexpressed in the  
375 fetal membranes of previa and PAS patients. These differences were initially identified by  
376 sequencing of patient samples and then confirmed by immunofluorescence using both  
377 discovery and validation cohorts. We found that PRG2 is upregulated in both previa and PAS  
378 patients in both cohorts, making this the most robust marker to emerge from this study. We  
379 further demonstrated that AQPEP discriminates between controls and previa in both cohorts.  
380 AQPEP also discriminates between controls and PAS in the discovery cohort but not in the  
381 second cohort. Data suggest that HLAG may be misexpressed in previa fetal membranes  
382 compared to controls, but this association is weaker than for PRG2 and AQPEP. The few  
383 differences in the observations between discovery cohort 1 and validation cohort 2 (HLA-G  
384 levels in previa, AQPEP levels in PAS) may be attributed to the inherent variability in human  
385 patient samples as well as the larger span of gestational ages in cohort 2 (see Results and  
386 Supplemental Table S1). The trends identified in the fetal membranes were also shown to exist  
387 in the placental disk of the discovery cohort. Taken together, this work suggests that PRG2 and  
388 AQPEP are markers for previa and PAS disease within the fetal membranes and further  
389 supports the idea that extraembryonic tissues are globally altered within these disease states.

390  
391 PRG2 and AQPEP have previously been shown to be expressed in the placenta and  
392 have been implicated in diseases affecting pregnancy. PRG2 (Proteoglycan 2) is expressed in  
393 multiple cell types, with its highest expression in the placenta<sup>38</sup>. While the precise role of PRG2  
394 during pregnancy is unknown, PRG2 has been shown to be higher in expression in  
395 preeclampsia<sup>39-41</sup>, maternal obesity<sup>42</sup>, gestational hypertension<sup>43</sup>, and Chagas disease<sup>44</sup>. PRG2  
396 in its proform is also found at high levels in the placenta<sup>38</sup> and in pregnancy serum<sup>45</sup>, where it  
397 forms a complex with PAPP-A (pregnancy-associated plasma protein A), a molecule that has  
398 been implicated in placental development and pregnancy disorders such as low birth weight<sup>46</sup>,

399 miscarriage<sup>47</sup>, and preeclampsia<sup>48</sup>. AQPEP (aminopeptidase Q or laeverin) is a placenta-  
400 specific aminopeptidase expressed in HLA-G<sup>+</sup> EVT<sup>s</sup> and has been shown to be necessary and  
401 sufficient for EVT migration in in vitro primary villous explant outgrowth assays<sup>49,50</sup>. In addition,  
402 AQPEP inhibits the activity of other placental proteins by cleaving the N-terminal amino acids of  
403 peptides such as angiotensin III, kisspeptin-10, and endokinin C, suggesting that the enzyme  
404 plays important roles in human placentation<sup>51</sup>. AQPEP expression is higher in preeclampsia<sup>52,53</sup>,  
405 suggesting its involvement in placental disorders that warrants further investigation. Our  
406 identification of PRG2 and AQPEP as a feature of these diseases provides an inroad to more  
407 mechanistic studies.

408

409         The set of genes upregulated in previa and PAS are enriched for EVT-specific markers,  
410 suggesting that there may be a cell fate change toward a more invasive trophoblast program in  
411 these diseases. The presence of these molecular changes in previa and PAS tissues is hardly  
412 surprising, given that abnormal placentation into the poorly vascularized lower uterine segment  
413 may induce compensatory responses that are ultimately manifested at the structural, cellular,  
414 and molecular levels<sup>54</sup>. Whether these EVT changes are merely the consequence of an altered  
415 uterine environment and play no role in disease etiology, or whether they arise from an altered  
416 uterine environment and directly contribute to disease progression, remain to be determined.  
417 Defining the precise etiologies of these diseases will be invaluable for understanding disease  
418 progression and identifying possible points of intervention.

419

420         This work uncovers a disease signature in the fetal membranes of previa and PAS  
421 patients, an unexpected finding since the disease pathology for previa and PAS is manifested in  
422 the placental disk. This result is bolstered by clinical observations that support the possibility of  
423 a fetal membrane component in these conditions. For example, some reports have noted  
424 adherent or retained membranes associated with PAS deliveries<sup>23</sup>. In some pregnancies,

425 myofibers can be found associated with fetal membranes in conjunction with basal plate  
426 myofibers<sup>24</sup>, which are often associated with or precede PAS pregnancies<sup>55,56</sup>. Indeed,  
427 consistent with these reports, clinical notes from two of the PAS patients in our study (samples  
428 A1 and A15) indicated membranes adherent to the uterine walls. This raises the question of  
429 how the fetal membranes could harbor an invasive or “sticky” predisposition when the diseases  
430 have previously only been associated with the placenta itself. Three models might explain this  
431 phenomenon: 1) early implantation in the lower uterine segment (previa) results in a molecular  
432 perturbation in all extraembryonic tissues throughout the conceptus that is maintained for the  
433 duration of the pregnancy, 2) direct molecular communication between the fetal membranes and  
434 placental disk throughout gestation allow pathologies in any one region to spread throughout  
435 the extraembryonic tissues, and 3) perturbed endocrine signaling due to previa and/or PAS that  
436 results in shared molecular signatures across the extraembryonic tissues. Recently, molecular  
437 and cellular changes were also found in preeclamptic fetal membranes<sup>31</sup>, which might support  
438 wider communication between different extraembryonic tissues either at implantation or  
439 throughout pregnancy.

440

441 Overall, this study is the first to examine molecular changes in the fetal membranes in  
442 previa and PAS and supports further study of the role of the fetal membranes in human disease.  
443 Future studies taking a comprehensive view of dysregulated molecules within the conceptus  
444 both at the site of pathological adherence as well as throughout the entire extraembryonic  
445 tissues, would be important for advancing our understanding of these diseases.

446

447

448

449

450

451 **Acknowledgements**

452 We thank Amy Heerema-McKenney for assistance with identifying patients for this study and  
453 selecting tissue regions for 3SEQ. We thank Jessica K. Chang for assistance with bioinformatic  
454 analyses, Huaying Fang and Sunny X. Tang for advice on statistical analyses, and Kristen L.  
455 Wells for assistance with R graphics. We thank Opher Kornfeld for the MATLAB cell counting  
456 script. We thank Amarjeet Grewal for assistance with sectioning and histology. We thank Imee  
457 Datoc and Emily E. Ryan for assistance with patient chart data abstraction. We also thank Kelly  
458 Ormond for input on patient confidentiality-related matters. Lastly, we wish to thank all members  
459 of the Baker lab for suggestions and feedback regarding the project.

460

461

462 **Conflict of interest**

463 The authors have no conflicts of interest to declare.

464

465

466 **Author Contributions**

467 E.T.Z., J.R.S., and R.L.H. performed bioinformatic experiments and analyses. A.K.F. and D.J.L.  
468 identified patients for this study, biobanked patient samples, and provided expertise and guidance  
469 on study design. A.K.F. gathered the cases and controls and reviewed H&E slides to determine  
470 tissue areas to be cored for the project. R.L.H. performed 3SEQ. E.T.Z., K.M.B.R., and K.M.  
471 performed immunofluorescence experiments with assistance from X.Z. with data analysis. G.M.,  
472 X.Z., J.P., M.K., and A.E.U provided EVT and VCT data prior to publication. G.M., X.Z., R.L.H.,  
473 J.P., M.K., and E.T.Z. performed EVT and VCT data analysis and interpretation. J.P., and M.K.  
474 provided expertise on EVT biology. E.T.Z. and J.C.B. wrote the paper. All authors contributed to  
475 experimental design and interpretation and provided comments on the manuscript.

476

477 **References:**

478

479 1. Wortman, A. C. & Alexander, J. M. Obstetrics and Gynecology Clinics of North America.  
480 *Obstet Gyn Clin N Am* **40**, 137–154 (2013).

481 2. Jauniaux, E., Grønbeck, L., Bunce, C., Langhoff-Roos, J. & Collins, S. L. Epidemiology of  
482 placenta previa accreta: a systematic review and meta-analysis. *Bmj Open* **9**, e031193 (2019).

483 3. Enebe, JT., Ofor, IJ. & Okafor, II. PLACENTA PERCRETA CAUSING SPONTANEOUS  
484 UTERINE RUPTURE AND INTRAUTERINE FETAL DEATH IN AN UNSCARED UTERUS: A  
485 CASE REPORT. *Int J Surg Case Reports* **65**, 65–68 (2019).

486 4. Fitzpatrick, K. E. *et al.* Incidence and risk factors for placenta accreta/increta/percreta in the  
487 UK: a national case-control study. *Plos One* **7**, e52893 (2012).

488 5. Silver, R. M. *et al.* Maternal Morbidity Associated With Multiple Repeat Cesarean Deliveries.  
489 *Obstetrics Gynecol* **107**, 1226–1232 (2006).

490 6. Rosenberg, T., Pariente, G., Sergienko, R., Wiznitzer, A. & Sheiner, E. Critical analysis of risk  
491 factors and outcome of placenta previa. *Arch Gynecol Obstet* **284**, 47–51 (2010).

492 7. Weiner, E. *et al.* The effect of placenta previa on fetal growth and pregnancy outcome, in  
493 correlation with placental pathology. *J Perinatology Official J Calif Périnat Assoc* **36**, 1073–1078  
494 (2016).

495 8. Yadava, P. A., Patel, R. R. & Mehta, A. S. Placenta previa: risk factors, fetomaternal  
496 outcome and complications. *Int J Reproduction Contracept Obstetrics Gynecol* **8**, 4842–4846  
497 (2019).

498 9. Crane, J. M. G., Hof, M. C. V. den, Dodds, L., Armson, B. A. & Liston, R. MATERNAL  
499 COMPLICATIONS WITH PLACENTA PREVIA. *Am J Perinat* **Volume 17**, 101–106 (2000).

500 10. Williams, M. A. & Mittendorf, R. Increasing maternal age as a determinant of placenta  
501 previa. More important than increasing parity? *J Reproductive Medicine* **38**, 425–8 (1993).

502 11. Wennberg, A. L. *et al.* Effect of maternal age on maternal and neonatal outcomes after  
503 assisted reproductive technology. *Fertil Steril* **106**, 1142–1149.e14 (2016).

504 12. Ogawa, K. *et al.* Association between very advanced maternal age and adverse pregnancy  
505 outcomes: a cross sectional Japanese study. *Bmc Pregnancy Childb* **17**, 349 (2017).

506 13. Bauer, A. M., Hackney, D. N., El-Nashar, S. & Sheyn, D. Pregnancy Outcomes after  
507 Endometrial Ablation in a Multi-institutional Cohort. *Am J Perinat* **35**, 931–935 (2018).

508 14. Khong, T. Y. & Robertson, W. B. Placenta creta and placenta praevia creta. *Placenta* **8**,  
509 399–409 (1987).



- 510 15. Cramer, S. F. & Heller, D. PLACENTA ACCRETA AND PLACENTA INCRETA - AN  
511 APPROACH TO PATHOGENESIS BASED ON THE TROPHOBLASTIC DIFFERENTIATION  
512 PATHWAY. *Pediatr Devel Pathol* **19**, 15-05-1641-OA.1 (2015).
- 513 16. Tantbirojn, P., Crum, C. P. & Parast, M. M. Pathophysiology of placenta creta: the role of  
514 decidua and extravillous trophoblast. *Placenta* **29**, 639 645 (2008).
- 515 17. Biswas, R., Sawhney, H., Dass, R., Saran, R. K. & Vasishta, K. Histopathological study of  
516 placental bed biopsy in placenta previa. *Acta Obstet Gynecol Scand* **78**, 173 179 (1999).
- 517 18. Han, Q. *et al.* Expression of  $\beta$ -catenin in human trophoblast and its role in placenta accreta  
518 and placenta previa. *J Int Med Res* **47**, 206–214 (2018).
- 519 19. Xie, H. *et al.* Increased expression of high mobility group box protein 1 and vascular  
520 endothelial growth factor in placenta previa. *Mol Med Rep* **16**, 9051–9059 (2017).
- 521 20. McNally, L. *et al.* Up-regulated cytotrophoblast DOCK4 contributes to over-invasion in  
522 placenta accreta spectrum. *P Natl Acad Sci Usa* **117**, 15852–15861 (2020).
- 523 21. Özer, A., Yaylalı, A. & Koçarslan, S. The role of osteopontin in the pathogenesis of placenta  
524 percreta. *Ginekol Pol* **89**, 438–442 (2018).
- 525 22. Garrido-Gomez, T. *et al.* Severe pre-eclampsia is associated with alterations in  
526 cytotrophoblasts of the smooth chorion. *Development* **144**, 767 777 (2017).
- 527 23. Stanek, J. & Drummond, Z. Occult placenta accreta: the missing link in the diagnosis of  
528 abnormal placentation. *Pediatr Devel Pathol* **10**, 266 273 (2007).
- 529 24. Khong, T. Y., Cramer, S. F. & Heller, D. S. TEMPORARY REMOVAL: Chorion laeve  
530 accreta-Another manifestation of morbid adherence. *Placenta* **74**, 32–35 (2018).
- 531 25. Beck, A. H. *et al.* 3'-end sequencing for expression quantification (3SEQ) from archival  
532 tumor samples. *Plos One* **5**, e8768 (2010).
- 533 26. Trapnell, C., Pachter, L. & Salzberg, S. L. TopHat: discovering splice junctions with RNA-  
534 Seq. *Bioinform Oxf Engl* **25**, 1105–11 (2009).
- 535 27. Martin, M. Cutadapt removes adapter sequences from high-throughput sequencing reads.  
536 *Embnet J* **17**, 10–12 (2011).
- 537 28. Foley, J. W. & Sidow, A. Transcription-factor occupancy at HOT regions quantitatively  
538 predicts RNA polymerase recruitment in five human cell lines. *Bmc Genomics* **14**, 720 (2013).
- 539 29. Anders, S. & Huber, W. Differential expression analysis for sequence count data. *Genome*  
540 *Biol* **11**, R106 (2010).
- 541 30. Vondra, S. *et al.* Metabolism of cholesterol and progesterone is differentially regulated in  
542 primary trophoblastic subtypes and might be disturbed in recurrent miscarriages. *J Lipid Res* **60**,  
543 1922–1934 (2019).



- 544 31. Trapnell, C. *et al.* Transcript assembly and quantification by RNA-Seq reveals unannotated  
545 transcripts and isoform switching during cell differentiation. *Nat Biotechnol* **28**, 511–5 (2010).
- 546 32. Schneider, C. A., Rasband, W. S. & Eliceiri, K. W. NIH Image to ImageJ: 25 years of image  
547 analysis. *Nat Methods* **9**, 671–675 (2012).
- 548 33. Tsang, J. C. H. *et al.* Integrative single-cell and cell-free plasma RNA transcriptomics  
549 elucidates placental cellular dynamics. *Proc National Acad Sci* **114**, E7786–E7795 (2017).
- 550 34. Apps, R. *et al.* Genome-wide expression profile of first trimester villous and extravillous  
551 human trophoblast cells. *Placenta* **32**, 33–43 (2011).
- 552 35. Edfors, F. *et al.* Gene-specific correlation of RNA and protein levels in human cells and  
553 tissues. *Mol Syst Biol* **12**, 883 (2016).
- 554 36. Gry, M. *et al.* Correlations between RNA and protein expression profiles in 23 human cell  
555 lines. *Bmc Genomics* **10**, 365 (2009).
- 556 37. Vogel, C. & Marcotte, E. M. Insights into the regulation of protein abundance from proteomic  
557 and transcriptomic analyses. *Nat Rev Genetics* **13**, 227–32 (2012).
- 558 38. Maddox, D. E. *et al.* Localization of a molecule immunochemically similar to eosinophil  
559 major basic protein in human placenta. *The Journal of experimental medicine* **160**, 29 41  
560 (1984).
- 561 39. Gormley, M. *et al.* Preeclampsia: novel insights from global RNA profiling of trophoblast  
562 subpopulations. *Am J Obstet Gynecol* **217**, 200.e1 200.e17 (2017).
- 563 40. Weyer, K. & Glerup, S. Placental Regulation of Peptide Hormone and Growth Factor Activity  
564 by proMBP. *Biol Reprod* **84**, 1077–1086 (2011).
- 565 41. He, P., Shao, D., Ye, M. & Zhang, G. Analysis of gene expression identifies candidate  
566 markers and pathways in pre-eclampsia. *J Obstet Gynaecol* **35**, 578 584 (2015).
- 567 42. Altmäe, S. *et al.* Maternal Pre-Pregnancy Obesity Is Associated with Altered Placental  
568 Transcriptome. *Plos One* **12**, e0169223 (2017).
- 569 43. Pihl, K., Larsen, T., Rasmussen, S., Krebs, L. & Christiansen, M. The proform of eosinophil  
570 major basic protein: a new maternal serum marker for adverse pregnancy outcome. *Prenatal*  
571 *Diag* **29**, 1013 1019 (2009).
- 572 44. Juiz, N. A. *et al.* Alterations in Placental Gene Expression of Pregnant Women with Chronic  
573 Chagas Disease. *Am J Pathology* **188**, 1345–1353 (2018).
- 574 45. Maddox, D. E., Butterfield, J. H., Ackerman, S. J., Coulam, C. B. & Gleich, G. J. Elevated  
575 serum levels in human pregnancy of a molecule immunochemically similar to eosinophil granule  
576 major basic protein. *The Journal of experimental medicine* **158**, 1211 1226 (1983).

- 577 46. Smith, G. C. S. *et al.* Development: Early-pregnancy origins of low birth weight. *Nature* **417**,  
578 417916a (2002).
- 579 47. Tong, S., Marjono, B., Mulvey, S. & Wallace, E. M. Low levels of pregnancy-associated  
580 plasma protein-A in asymptomatic women destined for miscarriage. *Fertil Steril* **82**, 1468–1470  
581 (2004).
- 582 48. Kalousová, M., Muravská, A. & Zima, T. Advances in Clinical Chemistry. *Adv Clin Chem* **63**,  
583 169–209 (2014).
- 584 49. Fujiwara, H. *et al.* Human extravillous trophoblasts express laeverin, a novel protein that  
585 belongs to membrane-bound gluzincin metalloproteinases. *Biochem Biophys Res Commun* **313**, 962–  
586 968 (2004).
- 587 50. Horie, A. *et al.* Laeverin/aminopeptidase Q induces trophoblast invasion during human early  
588 placentation. *Hum Reprod* **27**, 1267–1276 (2012).
- 589 51. Maruyama, M. *et al.* Laeverin/Aminopeptidase Q, a Novel Bestatin-sensitive Leucine  
590 Aminopeptidase Belonging to the M1 Family of Aminopeptidases. *J Biol Chem* **282**, 20088–  
591 20096 (2007).
- 592 52. Nystad, M. *et al.* Longitudinal reference ranges for maternal plasma laeverin, and its role as  
593 a potential biomarker of preeclampsia. *BMC Pregnancy Childbirth* **16**, 377 (2016).
- 594 53. Nystad, M., Sitras, V., Larsen, M. & Acharya, G. Placental expression of aminopeptidase-Q  
595 (laeverin) and its role in the pathophysiology of preeclampsia. *Am J Obstet Gynecol* **211**, 686–e1  
596 31 (2014).
- 597 54. Jung, E. J. *et al.* Placental pathologic changes and perinatal outcomes in placenta previa.  
598 *Placenta* **63**, 15–20 (2017).
- 599 55. Heller, D. S., Wyand, R. & Cramer, S. Recurrence of Basal Plate Myofibers, with Further  
600 Consideration of Pathogenesis. *Fetal Pediatr Pathol* **38**, 1–14 (2018).
- 601 56. Miller, E. S., Linn, R. L. & Ernst, L. M. Does the presence of placental basal plate  
602 myometrial fibres increase the risk of subsequent morbidly adherent placenta: a case-control  
603 study. *BJOG Int J Obstetrics Gynaecol* **123**, 2140–2145 (2015).

604

605

606

607

608

609

## 610 Figure Legends

611

### 612 **Figure 1: Genes upregulated in previa and percreta are EVT-specific.**

613 A. Structure and cell types of human fetal membranes. Schematic illustration showing the  
614 cellular layers that comprise the chorionic membranes: the amnion (a), chorionic mesoderm (c),  
615 trophoblasts (t), and decidua (d).

616 B. Principal component analysis of 3SEQ of all 13 samples: 2 previa, 2 percreta, and 9  
617 spontaneous pre-term birth (SPTB).

618 C. Volcano plot showing differentially-expressed genes (DEGs) between previa and percreta  
619 samples vs. SPTB samples. Genes demonstrating both an adjusted p-value < 0.05 and a log<sub>2</sub>  
620 fold-change either < -1 or > 1 are indicated in magenta. Genes with only a log<sub>2</sub> fold-change  
621 either < -1 or > 1 are indicated in green, whereas genes with only an adjusted p-value < 0.05  
622 are indicated in black. All remaining genes that reached neither statistical significance nor fold-  
623 change thresholds are indicated in gray.

624 D. GO terms associated with previa and percreta vs. SPTB DEGs. -log<sub>10</sub> Bonferonni-corrected  
625 adjusted p-values are shown. Dashed gray line indicates adjusted p-value < 0.05 threshold.

626 E. Scatter plot illustrating the overrepresentation of invasive extravillous trophoblast (EVT)  
627 genes amongst genes upregulated in previa and percreta (Pr & P) vs. SPTB (magenta). Genes  
628 only significantly up- or down-regulated in previa & percreta vs. SPTB but not in EVTs vs.  
629 progenitor villous cytotrophoblasts (VCTs) are indicated in black. Genes only significantly up- or  
630 down-regulated in EVTs vs. VCTs but not in previa & percreta vs. SPTB are indicated in green.  
631 All other genes are indicated in gray.

632

633

634

### 635 **Figure 2: Higher levels of PRG2 and AQPEP protein in previa and PAS fetal membranes.**

636 A. Representative images from immunofluorescence staining of SPTB, previa, and percreta  
637 chorionic membrane samples using anti-PRG2, anti-AQPEP, and anti-HLA-G antibodies. Scale  
638 bar = 200 μm. blue = DAPI, green = antibody staining.

639 B. Quantification of the mean fluorescence intensities (Fluorescence) per image (see Methods)  
640 for anti-PRG2 (left), anti-AQPEP (middle), and anti-HLA-G (right). p-value < 0.05 (\*), p-value <  
641 0.01 (\*\*), p-value < 0.001 (\*\*\*), p-value < 0.1 (.), and not statistically significant (n.s.) are  
642 indicated as shown.

643 C. Linear regression of 3SEQ RNA levels (log<sub>2</sub> normalized read count) vs. average sample  
644 protein levels as measured by immunofluorescence intensity (Fluorescence) for the indicated  
645 markers PRG2, AQPEP, and HLA-G.

646

647

648

649

### 650 **Figure 3: PRG2 and AQPEP protein levels are higher in previa and PAS placental disk** 651 **samples compared to SPTB.**

652 A. Representative images from immunofluorescence staining of SPTB, previa, and percreta  
653 placental disk samples for the markers PRG2, AQPEP, and HLA-G. Scale bar = 200 μm. blue =  
654 DAPI, green = antibody staining. Villi (v) and decidua (d) are indicated.

655 B. Quantification of anti-PRG2, anti-AQPEP, and anti-HLA-G mean fluorescence intensity levels  
656 (Fluorescence) per image (see Methods). p-value < 0.05 (\*), p-value < 0.01 (\*\*), p-value < 0.001  
657 (\*\*\*), p-value < 0.1 (.), and not statistically significant (n.s.) are indicated as shown.

658

659 **Figure 4: Validation cohort of patients display higher levels of PRG2 in both previa and**  
660 **accreta and higher levels of AQPEP in previa.**  
661 A. Quantitation of PRG2 total immunofluorescence signal intensities in CK7<sup>+</sup> trophoblasts.  
662 B. Quantitation of AQPEP total immunofluorescence signal intensities in CK7<sup>+</sup> trophoblasts.  
663 C. Quantitation of HLA-G total immunofluorescence signal intensities in CK7<sup>+</sup> trophoblasts.  
664 (A-C) p-value < 0.05 (\*), p-value < 0.01 (\*\*), p-value < 0.001 (\*\*\*), and not statistically significant  
665 (n.s.) are indicated as shown.

# Figure 1

**A**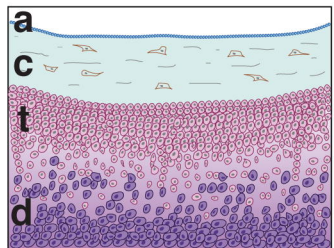**B**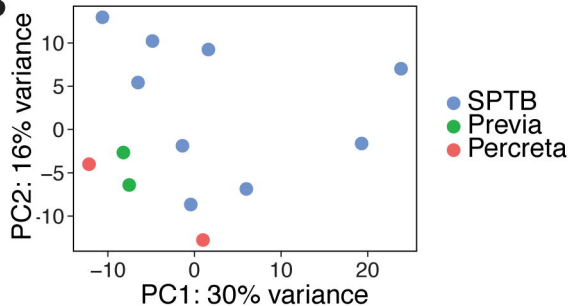**C**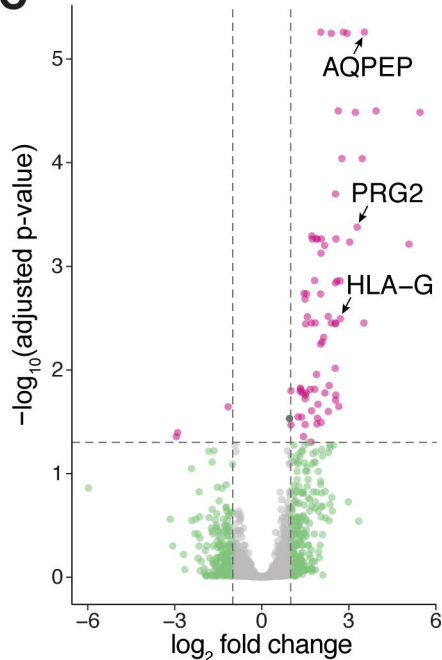**D**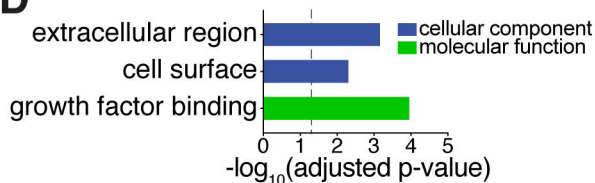**E**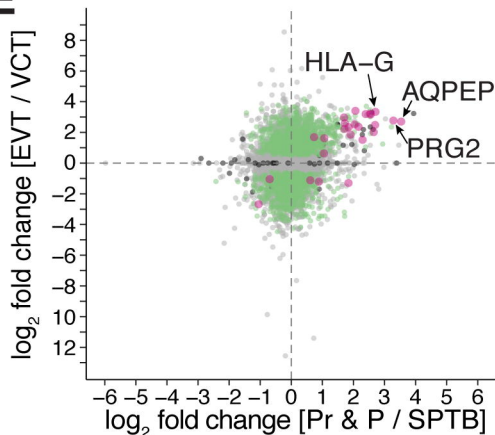

# Figure 2

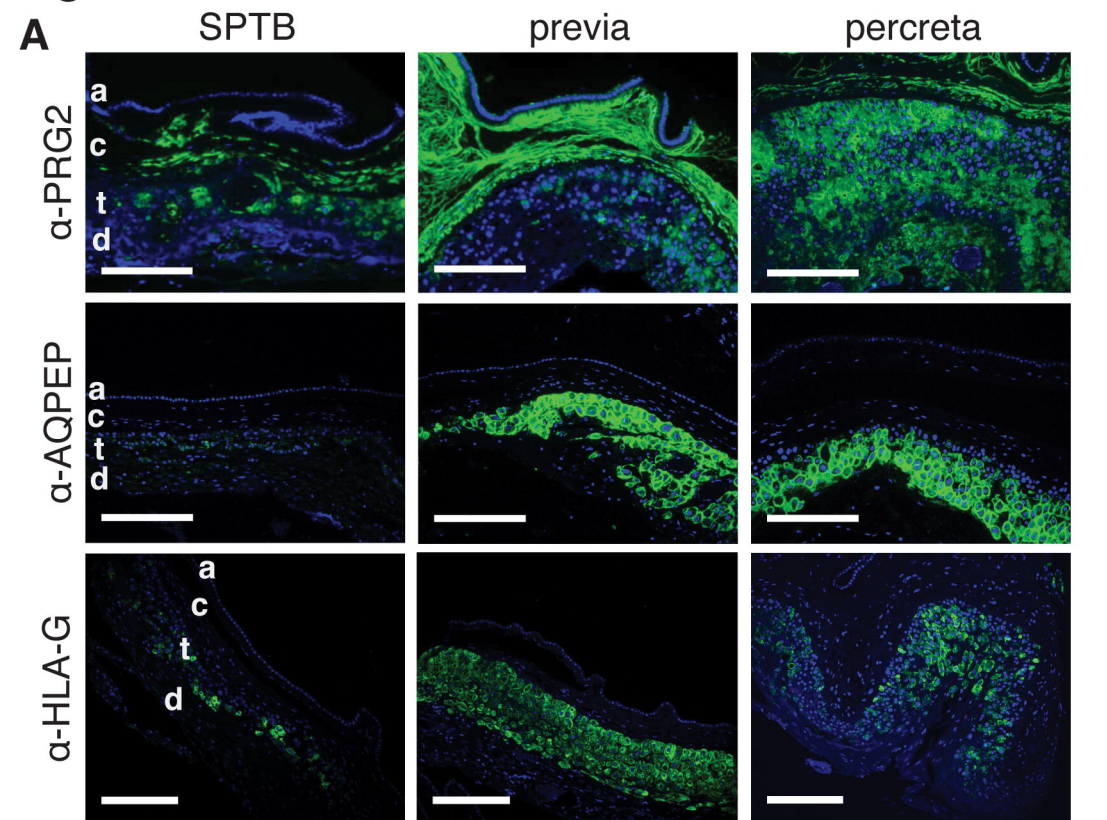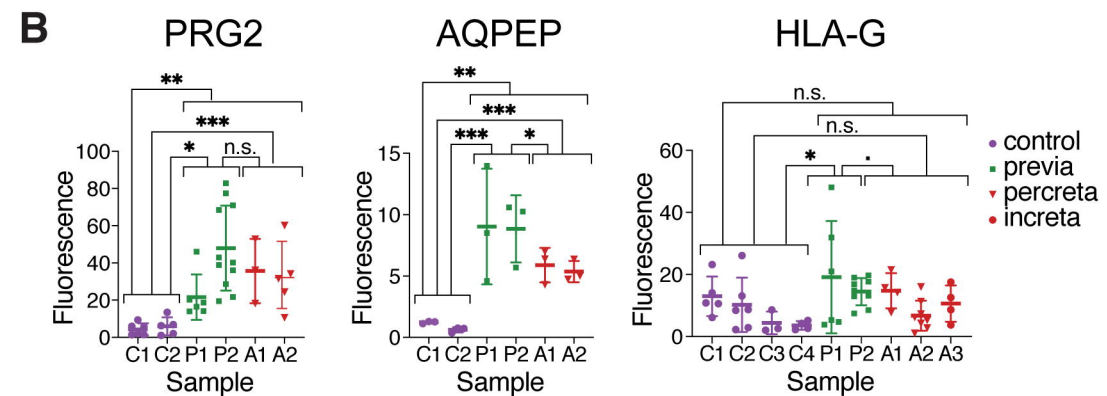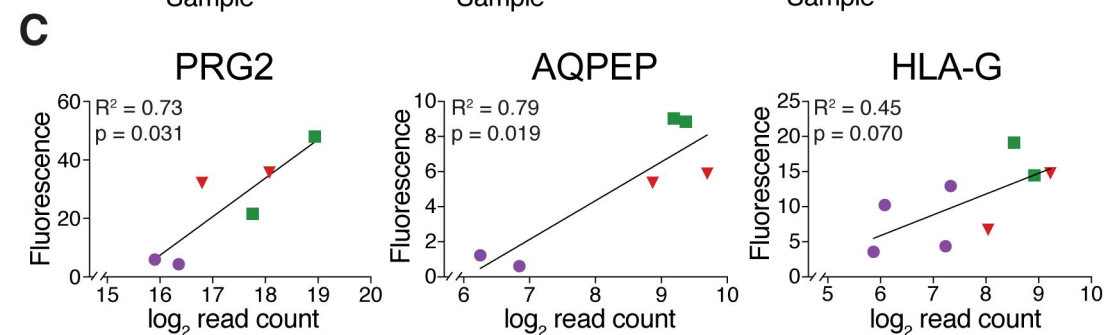



# Figure 3

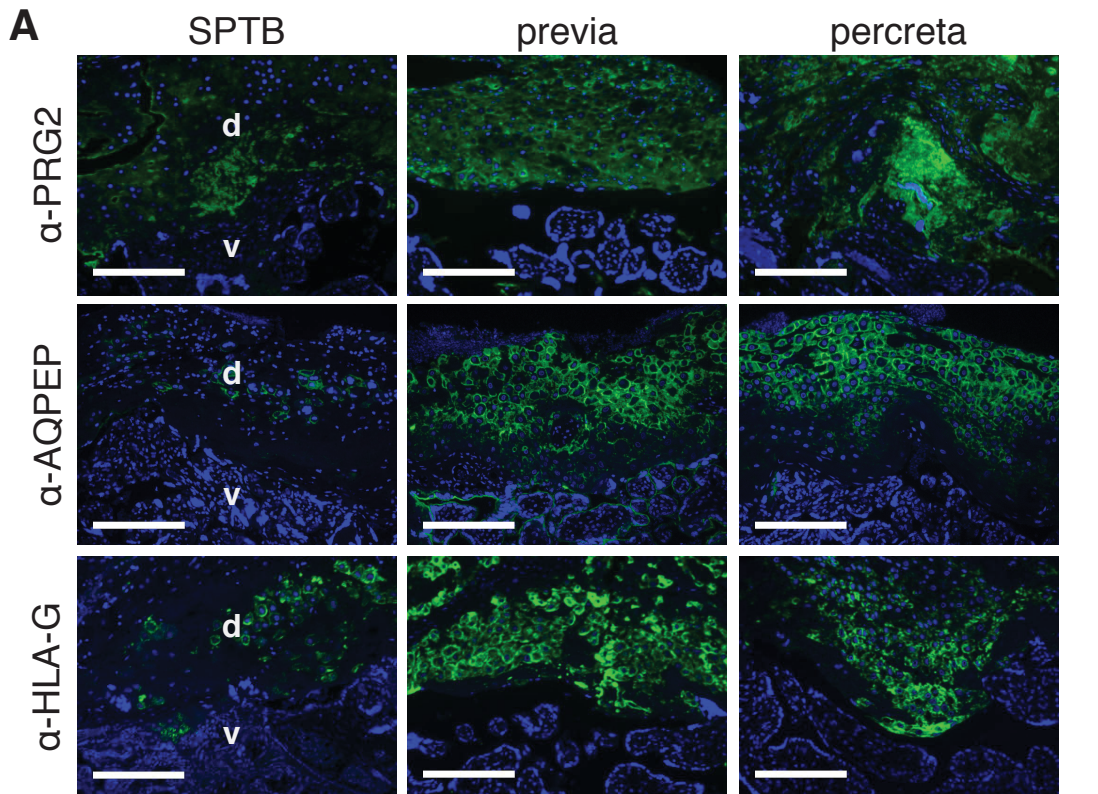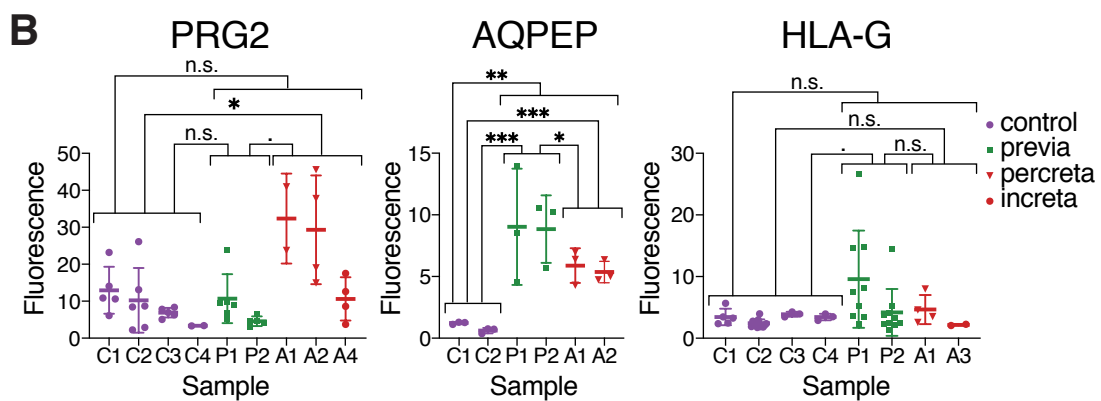

# Figure 4

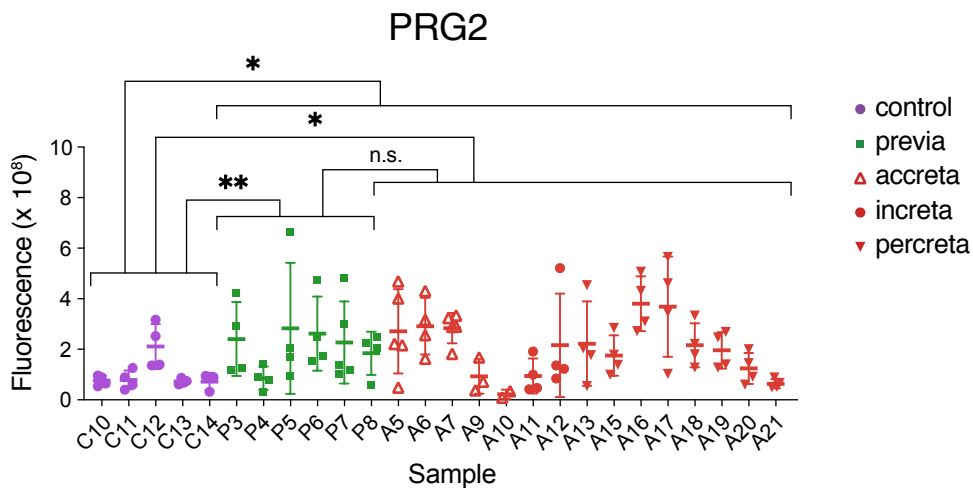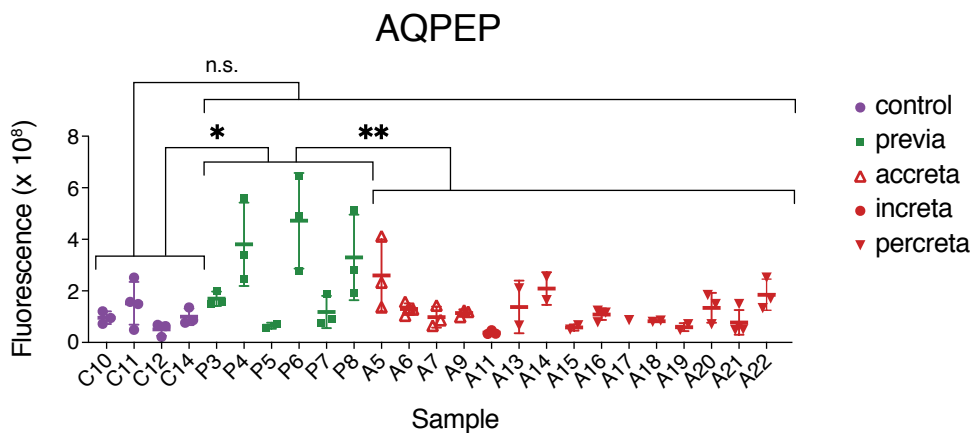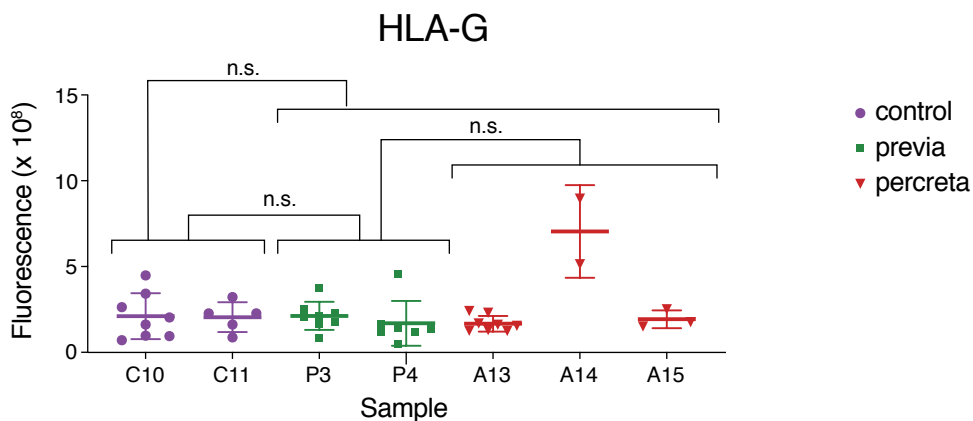



**Table 1**

|       | Cohort #1 M (v. SPTB) |     | Cohort #2 M (v. ctrls) |     | Cohort #1 Plac (v. SPTB) |     |
|-------|-----------------------|-----|------------------------|-----|--------------------------|-----|
|       | Previa                | PAS | Previa                 | PAS | Previa                   | PAS |
| PRG2  | +                     | +   | +                      | +   | -                        | +   |
| AQPEP | +                     | +   | +                      | -   | +                        | +   |
| HLA-G | +                     | -   | -                      | -   | -                        | -   |
