# Supplementary material for: PRG2 and AQPEP are misexpressed in fetal membranes in placenta previa and percreta
Source: bioRxiv or medRxiv preprint supplement (doi:10.1101/2020.08.14.248807), 2020-08-14
Supplement: Supplementary file [file media-3.pdf]

| Sample ID | Patient ID | Antepartum diagnosis                                               | Pathology diagnosis                                                                                          | Previa, Y/N | Maternal age | GA at delivery (nearest half-week) | Placental weight             | # prior uterine procedures (CS, D&C, and/or myomectomy) | Mode of delivery | Other notes                                                                 |
|-----------|------------|--------------------------------------------------------------------|--------------------------------------------------------------------------------------------------------------|-------------|--------------|------------------------------------|------------------------------|---------------------------------------------------------|------------------|-----------------------------------------------------------------------------|
| Cohort 1: |            |                                                                    |                                                                                                              |             |              |                                    |                              |                                                         |                  |                                                                             |
| C1        | NP1        | Spontaneous pre-term birth                                         | Normal placenta                                                                                              | N           | < 35         | 29.5 wk                            | 253 g                        | 1                                                       | VD               |                                                                             |
| C2        | NP2        | Spontaneous pre-term birth                                         | Placenta with accessory lobe                                                                                 | N           | < 35         | 31 wk                              | 278 g, incl. accessory lobe  | 0                                                       | CD               | advanced cervical dilation before C-section                                 |
| C3        | NP3        | Spontaneous pre-term birth                                         | Normal placenta                                                                                              | N           | < 35         | 28 wk                              | 230 g                        | 0                                                       | VD               | vaginal bleeding; GBS (+)                                                   |
| C4        | NP4        | Spontaneous pre-term birth; posterior placenta                     | Normal placenta                                                                                              | N           | ≥ 35         | 32 wk                              | 390 g (75th percentile)      | 0                                                       | VD               |                                                                             |
| C5        | NP5        | Spontaneous pre-term birth                                         | Normal placenta; translucent fetal membranes with several fibrous clots                                      | N           | < 35         | 31 wk                              | 460 g                        | 1                                                       | CD               | history of prior classical C-section                                        |
| C6        | NP6        | Spontaneous pre-term birth                                         | Large placenta for gestational age                                                                           | N           | < 35         | 28.5 wk                            | 312 g                        | 2                                                       | CD               |                                                                             |
| C7        | NP7        | Spontaneous pre-term birth; probable placenta abruption            | Placental disk with adjacent hemorrhage, consistent with placental abruption                                 | N           | < 35         | 29.5 wk                            | 330 g                        | 1                                                       | VD               |                                                                             |
| C8        | NP8        | Spontaneous pre-term birth                                         | Normal placenta                                                                                              | N           | < 35         | 29 wk                              | 247 g                        | 1                                                       | CD               |                                                                             |
| C9        | NP9        | Spontaneous pre-term birth                                         | Amniotic fluid infection sequence; ruptured fetal membranes                                                  | N           | < 35         | 28 wk                              | 278 g (75th-90th percentile) | 0                                                       | VD               |                                                                             |
| P1        | NP10       | Marginal placenta previa                                           | Placenta previa; premature villos maturation consistent with placental insufficiency and vascular disruption | Y           | < 35         | 28 wk                              | 200 g                        | 0                                                       | CD               | vaginal bleeding                                                            |
| P2        | NP11       | Complete posterior placenta previa, bleeding                       | Placenta previa                                                                                              | Y           | ≥ 35         | 29.5 wk                            | 247 g (10th-25th percentile) | 1                                                       | CD               | vaginal bleeding; high transverse C-section                                 |
| A1        | NP12       | Complete anterior placenta previa; suspected percreta              | Placenta percreta and previa; uterine rupture; fetal membranes adherent to uterine walls                     | Y           | ≥ 35         | 30 wk                              | 200 g                        | 2                                                       | CD               | vaginal bleeding; gravid uterus with multiple omental and bladder adhesions |
| A2        | NP6        | Placenta previa and percreta                                       | Placenta percreta and previa; uterine rupture                                                                | Y           | < 35         | 30 wk                              | 207 g                        | ≥3                                                      | CD               | s/p Cesarean-hysterectomy                                                   |
| A3        | NP13       | Complete central placenta previa; concern for focal accreta; PPROM | Placenta in creta and previa                                                                                 | Y           | ≥ 35         | 30 wk                              | 220 g                        | ≥3                                                      | CD               | vaginal bleeding; s/p Cesarean hysterectomy                                 |
| A4        | NP4        | Complete placenta previa with concern for accreta                  | Placenta percreta and previa                                                                                 | Y           | < 35         | 32 wk                              | N/A                          | ≥3                                                      | CD               | s/p Cesarean hysterectomy                                                   |

|           |      |                                                                                                                                                                        |                                                                                                                           |   |      |         |                                        |    |    |                                                            |
|-----------|------|------------------------------------------------------------------------------------------------------------------------------------------------------------------------|---------------------------------------------------------------------------------------------------------------------------|---|------|---------|----------------------------------------|----|----|------------------------------------------------------------|
| Cohort 2: |      |                                                                                                                                                                        |                                                                                                                           |   |      |         |                                        |    |    |                                                            |
| C10       | NP15 | Cervical cancer; preterm labor                                                                                                                                         | Normal placenta; invasive, adenocarcinoma cancer                                                                          | N | ≥ 35 | 35 wk   | 400 g (50th-75th percentile)           | 1  | CD | cervical cancer; s/p Cesarean-Hysterectomy                 |
| C11       | NP16 | Cervical cancer; scheduled Cesarean hysterectomy                                                                                                                       | Normal placenta; negative for residual carcinoma                                                                          | N | < 35 | 34 wk   | 345 g (25th-50th percentile)           | 0  | CD | cervical cancer; s/p Cesarean hysterectomy                 |
| C12       | NP17 | PPROM; Twin gestation                                                                                                                                                  | Small for gestational age mono chorionic diamniotic twin placenta                                                         | N | < 35 | 32.5 wk | 205.5 g                                | 0  | VD | GBS (+)                                                    |
| A6        | NP17 | PPROM; Twin gestation                                                                                                                                                  | Small for gestational age mono chorionic diamniotic twin placenta; microscopic placenta accreta                           | N | < 35 | 32.5 wk | 134 g                                  | 0  | VD | GBS (+)                                                    |
| C13       | NP18 | PPROM                                                                                                                                                                  | Intermediate acute chorioamnionitis                                                                                       | N | < 35 | 37 wk   | 340 g (5th-10th percentile)            | 0  | CD | CD due to arrest of dilation                               |
| C14       | NP19 | Di/Di twin pregnancy; vaginal bleeding secondary to placenta previa with accreta, with concern for percreta; anterior placenta                                         | Normal twin placenta                                                                                                      | Y | ≥ 35 | 31.5 wk | Placenta B: 217 g (10-25th percentile) | 0  | CD | vaginal bleeding; IVF pregnancy; s/p Cesarean hysterectomy |
| A11       | NP19 | Di/Di twin pregnancy; vaginal bleeding secondary to placenta previa with accreta, with concern for percreta; complete central placenta previa with concern for accreta | Placenta in creta and previa; twin placenta                                                                               | Y | ≥ 35 | 31.5 wk | N/A                                    | 0  | CD | vaginal bleeding; IVF pregnancy; s/p Cesarean hysterectomy |
| P3        | NP20 | Placenta previa                                                                                                                                                        | Placenta previa                                                                                                           | Y | ≥ 35 | 37 wk   | 475 g (50th-75th percentile)           | 1  | CD |                                                            |
| P4        | NP21 | Marginal placenta previa                                                                                                                                               | Placenta previa; myometrium with implantation site changes                                                                | Y | < 35 | 36 wk   | 500 g (50th-75th percentile)           | 0  | CD | vaginal bleeding; s/p Cesarean hysterectomy                |
| P5        | NP22 | Placenta previa with suspected accreta                                                                                                                                 | Placenta previa; large placenta for gestational age                                                                       | Y | ≥ 35 | 35 wk   | 520.1 g (>97th percentile)             | 0  | CD |                                                            |
| P6        | NP23 | Complete anterior placenta previa                                                                                                                                      | Placenta previa; patchy chorionic hemodermoidosis suggestive of retroplacental bleeding                                   | Y | ≥ 35 | 29.5 wk | 330 g (50th-75th percentile)           | 3  | CD |                                                            |
| P7        | NP24 | Complete placenta previa                                                                                                                                               | Placenta previa; large for gestational age placenta; disrupted maternal surface                                           | Y | ≥ 35 | 34 wk   | 500 g                                  | 0  | CD | vaginal bleeding                                           |
| P8        | NP25 | Complete placenta previa                                                                                                                                               | Placenta previa                                                                                                           | Y | <35  | 31 wk   | 330 g (50th-75th percentile)           | 2  | CD | vaginal bleeding                                           |
| A5        | NP26 | Complete placenta previa and potential percreta                                                                                                                        | Placenta accreta (focal) and previa; laminar necrosis of decidua capsularis in fetal membranes                            | Y | ≥ 35 | 31 wk   | N/A                                    | ≥3 | CD | s/p Cesarean Hysterectomy                                  |
| A7        | NP27 | Complete anterior placenta previa; placenta accreta                                                                                                                    | Placenta accreta (focal) and previa; chronic villitis                                                                     | Y | < 35 | 33 wk   | 400 g (75th-90th percentile)           | 2  | CD | s/p Cesarean hysterectomy                                  |
| A9        | NP28 | Placenta previa, possible accreta                                                                                                                                      | Placenta accreta and previa                                                                                               | Y | ≥ 35 | 34 wk   | N/A                                    | 1  | CD | s/p Cesarean hysterectomy                                  |
| A10       | NP29 | Complete central placenta previa; no accreta                                                                                                                           | Placenta accreta and previa (cervical); small placenta for gestational age; laminar necrosis of decidua capsularis        | Y | ≥ 35 | 30 wk   | 197 g (5th-10th percentile)            | 1  | CD | vaginal bleeding; s/p Cesarean hysterectomy                |
| A12       | NP30 | Marginal anterior previa; placenta accreta                                                                                                                             | Placenta in creta and previa; patchy non-specific chronic villitis; chronic deciduitis; amniotic fluid infection sequence | Y | ≥ 35 | 36 wk   | 405 g (25th-50th percentile)           | ≥3 | CD | mild preeclampsia; s/p Cesarean hysterectomy               |
| A13       | NP31 | Placenta previa with suspected accreta, possibly percreta                                                                                                              | Placenta percreta and previa                                                                                              | Y | < 35 | 34 wk   | N/A                                    | 2  | CD |                                                            |
| A14       | NP32 | Complete central placenta previa with suspicion for accreta or in creta                                                                                                | Placenta percreta and previa (cervical)                                                                                   | Y | ≥ 35 | 36.5 wk | N/A                                    | ≥3 | CD | s/p Cesarean hysterectomy                                  |
| A15       | NP33 | Placenta previa with accreta, suspected percreta                                                                                                                       | Placenta percreta and previa; organizing intervillous hemorrhage; fetal membranes adherent to uterine cavity              | Y | ≥ 35 | 34.5 wk | N/A                                    | ≥3 | CD | s/p Cesarean Hysterectomy                                  |
| A16       | NP34 | Placenta previa; placenta accreta with high suspicion of percreta                                                                                                      | Placenta percreta and previa                                                                                              | Y | ≥ 35 | 35 wk   | 396 g (25th-50th percentile)           | ≥3 | CD | s/p Cesarean hysterectomy                                  |
| A17       | NP35 | Placenta previa with concern for placenta accreta                                                                                                                      | Placenta percreta and previa                                                                                              | Y | ≥ 35 | 34 wk   | N/A                                    | ≥3 | CD | s/p Cesarean hysterectomy                                  |
| A18       | NP36 | Placenta previa and percreta                                                                                                                                           | Placenta percreta and previa (complete)                                                                                   | Y | ≥ 35 | 32 wk   | N/A                                    | 1  | CD | s/p Cesarean hysterectomy                                  |
| A19       | NP37 | Complete central previa and accreta/ in creta with suspected percreta                                                                                                  | Placenta percreta and previa                                                                                              | Y | < 35 | 34 wk   | N/A                                    | ≥3 | CD | vaginal bleeding; s/p Cesarean hysterectomy                |
| A20       | NP38 | Complete placenta previa and in creta                                                                                                                                  | Placenta percreta; maternal placental underperfusion                                                                      | Y | ≥ 35 | 36 wk   | N/A                                    | 1  | CD |                                                            |
| A21       | NP39 | Complete central placenta previa; placental in creta or percreta                                                                                                       | Placenta percreta and previa                                                                                              | Y | < 35 | 28.5 wk | N/A                                    | ≥3 | CD | vaginal bleeding; s/p Cesarean hysterectomy                |
| A22       | NP40 | Possible focal accreta                                                                                                                                                 | Placenta percreta                                                                                                         | N | ≥ 35 | 37 wk   | N/A                                    | 2  | CD |                                                            |

Additional patient details available upon request.
